# Supplementary material for: Gluten-Free Bread with Cricket Powder—Mechanical Properties and Molecular Water Dynamics in Dough and Ready Product
Source: Foods. 2019 Jul 3;8(7):240. doi: 10.3390/foods8070240 (PMC6678567; doi:10.3390/foods8070240)
Supplement: Supplementary file 1 [file foods-08-00240-s001.pdf]

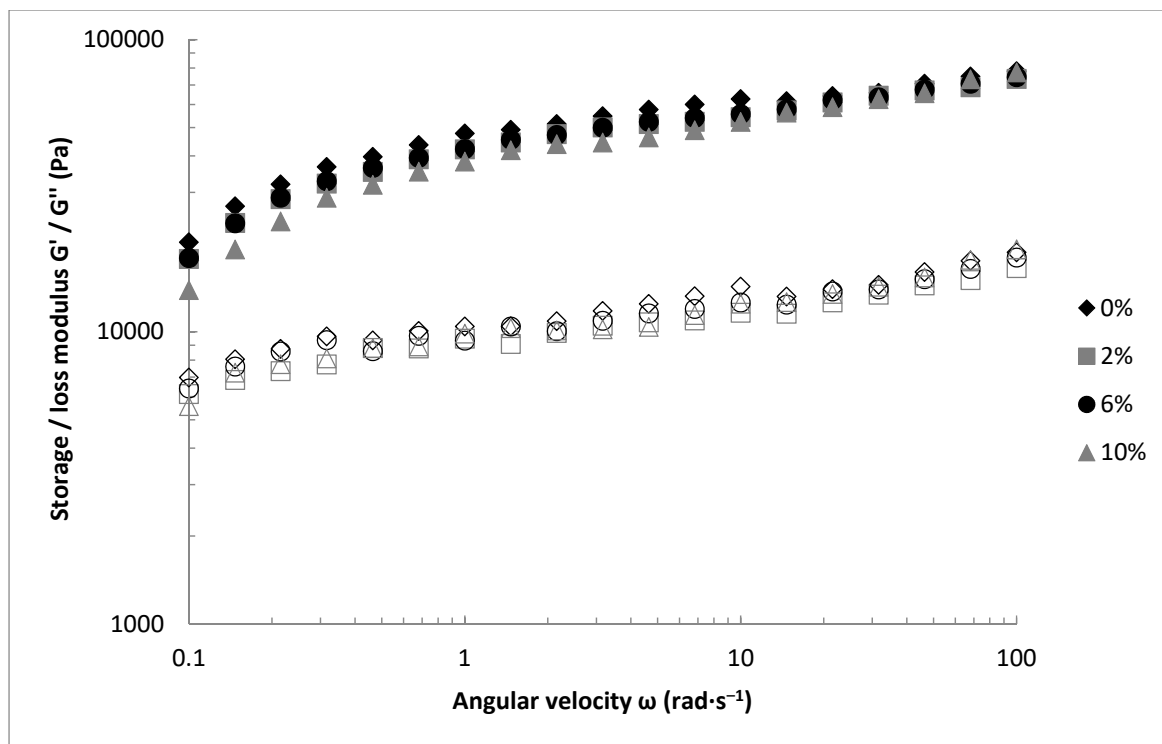

**Figure S1.** Mechanical spectra of gluten-free dough with cricket powder. Filled markers on the chart present  $G'$  values, while empty markers  $G''$  values.
